# Supplementary material
Source: PubMed Central journal article supplement (PMC1691799)
Supplement: 15315896s01.pdf [file 15315896s01.pdf]

These are electronic appendices to the paper by Holland *et al.* 2004 Evolutionary stability of mutualism: interspecific population regulation as an evolutionarily stable strategy. *Proc. R. Soc. Lond. B* **271**, 1807–1814. (DOI 10.1098/rspb.2004.2789.)

Electronic appendices are refereed with the text. However, no attempt is made to impose a uniform editorial style on the electronic appendices.

---

## ELECTRONIC APPENDIX A.

List of symbols of model variables and parameters, and their definitions.

---

| <b>Symbol</b> | <b>Meaning</b>                                                              |
|---------------|-----------------------------------------------------------------------------|
| $M$           | Pollinator population density                                               |
| $\gamma_1$    | Rate of flower pollination by pollinators                                   |
| $\gamma_2$    | Rate of flower oviposition by pollinators                                   |
| $\delta$      | Pollinator mortality rate                                                   |
| $F_i$         | Flower production of individual $i$                                         |
| $P_i$         | Fraction of flowers pollinated of individual $i$                            |
| $D_i$         | Fraction of flowers parasitized of individual $i$                           |
| $R_{fl,i}$    | Resources available for flower production by individual $i$                 |
| $R_{fr,i}$    | Resources available for fruit production by individual $i$                  |
| $R_{t,i}$     | Total resources available for reproduction by individual $i$                |
| $\alpha$      | Conversion efficiency of resources into flowers                             |
| $\beta$       | Conversion efficiency of resources into mature fruit                        |
| $G_i$         | Potential fruit production by individual $i$ , given available resources    |
| $F_{s,i}$     | Fruit set or initiation of individual $i$ , given pollination and resources |
| $W_{F,i}$     | Female fitness (seed or fruit production) of individual $i$                 |
| $W_{M,i}$     | Male fitness (pollen dispersal and donation) of individual $i$              |
| $W_i$         | Fitness of plant individual $i$                                             |

---

## ELECTRONIC APPENDIX B

An analytic approximation of (6) for the ratio-dependent case is possible by expanding the exponentials, keeping up to second order terms, as

$$e^{-\gamma_2 M / F} \cong 1 - \gamma_2 M / F + (1/2)(\gamma_2 M / F)^2 \quad (\text{A1})$$

$$e^{-\gamma_1 M / F} \cong 1 - \gamma_1 M / F + (1/2)(\gamma_1 M / F)^2 \quad (\text{A2})$$

From equation (A1), when  $\beta R_t R_{fr} > PF$ , the right hand side of equation (7) can be approximated and solved to obtain the equilibrium value of  $M$ :

$$M = 2F(\gamma_2 - d) / \gamma_2^2 = 2\alpha R_{fl} R_t (\gamma_2 - d) / \gamma_2^2 \quad (\text{A3})$$

From equation (A2), when  $\beta R_t R_{fr} < PF$ , the right hand side of equation (8) is approximated and solved for equilibrium to obtain;

$$M = \beta R_t R_{fr} (\gamma_2 / \gamma_1) / d = \beta R_t (1 - R_{fl}) (\gamma_2 / \gamma_1) / d \quad (\text{A4})$$

(In this case only the first order terms of the expansion are used.) Now it can be seen that as  $R_{fl}$  is increased from zero to larger values, as long as  $\beta R_t R_{fr} > PF$ ,  $M$  increases linearly with  $R_{fl}$ .

However, when the inequality is reversed, so that  $\beta R_t R_{fr} < PF$ ,  $M$  decreases as a function of  $R_{fl}$ .

Thus,  $M$  is a unimodal function of  $R_{fl}$ . This is a reasonable quantitative approximation of the 'exact' equations. The above approximations for  $M$  can be used in equations (4) and (5). When  $\beta R_t R_{fr} > PF$  the female fitness function is  $W_F = \alpha R_t R_{fl} (e^{-2(\gamma_2 - d) / \gamma_2} - e^{-2\gamma_1 (\gamma_2 - d) / \gamma_2^2})$ . When  $\beta R_t R_{fr} < PF$ , the female fitness function is

$$W_F = \beta R_t (1 - R_{fl}) (e^{-\beta(1-R_{fl})[\gamma_2^2 / (d\gamma_1 \alpha R_{fl})]} - e^{-\beta(1-R_{fl})[\gamma_2 / (d\alpha R_{fl})]}) / (1 - e^{-\beta(1-R_{fl})[\gamma_2 / (d\alpha R_{fl})]}) .$$

### ELECTRONIC APPENDIX C

Values of flower production strategies,  $R_{fl}$ , for plant fitness for the ecological model and for evolutionarily stable strategies for a wide range of parameter values of  $\alpha$ ,  $\beta$ ,  $\delta$ ,  $\gamma_1$ , and  $\gamma_2$ , for standard male fitness. Results are for ratio-dependent functional responses.

| $\alpha$ | $\beta$ | $\delta$ | $\gamma_1$ | $\gamma_2$ | Flower Production Strategy ( $R_{fl}$ ) |              |
|----------|---------|----------|------------|------------|-----------------------------------------|--------------|
|          |         |          |            |            | Ecological $R_{fl}$                     | ESS $R_{fl}$ |
| 1.0      | 1.0     | 0.5      | 6.0        | 3.0        | 0.83                                    | 0.73         |
| 2.0      | 1.0     | 0.5      | 6.0        | 3.0        | 0.72                                    | 0.66         |
| 3.0      | 1.0     | 0.5      | 6.0        | 3.0        | 0.64                                    | 0.62         |
| 4.0      | 1.0     | 0.5      | 6.0        | 3.0        | 0.60                                    | 0.59         |
| 8.0      | 1.0     | 0.5      | 6.0        | 3.0        | 0.46                                    | 0.55         |
| 1.0      | 2.0     | 0.5      | 6.0        | 3.0        | 0.90                                    | 0.79         |
| 1.0      | 4.0     | 0.5      | 6.0        | 3.0        | 0.94                                    | 0.84         |
| 2.0      | 1.0     | 1.0      | 6.0        | 3.0        | 0.59                                    | 0.60         |
| 2.0      | 1.0     | 0.5      | 5.0        | 3.0        | 0.72                                    | 0.66         |
| 2.0      | 1.0     | 0.5      | 4.0        | 3.0        | 0.72                                    | 0.66         |
| 2.0      | 1.0     | 0.5      | 3.0        | 2.0        | 0.64                                    | 0.62         |
| 2.0      | 1.0     | 0.5      | 3.0        | 1.0        | 0.54                                    | 0.57         |
